# Supplementary material
Source: PubMed Central journal article supplement (PMC4808197)
Supplement: AAC.02835-15_zac004165062so1.pdf [file AAC.02835-15_zac004165062so1.pdf]

**Table S1.** Primers used in this study

| Genes(s)          | Sequence 5'→3'             | Use                                   | Reference         |
|-------------------|----------------------------|---------------------------------------|-------------------|
| KPC F             | TGTCACGTATCGCCGTC          | Gene detection                        | 1                 |
| KPC R             | CTCAGTGTCTACAGAAAACC       | Gene detection                        | 1                 |
| OXA-48 F          | TTGGTGGCATCGATTATCGG       | Gene detection                        | 2                 |
| OXA-48 R          | GAGCACTCTTTTGATGGC         | Gene detection                        | 2                 |
| IMI F             | GTTCATTACCCATCACAAAC       | Gene detection                        | <i>This study</i> |
| IMI R             | CTACCGCATAATCATTGCGG       | Gene detection                        | <i>This study</i> |
| New IMI variant F | CTACGCTTAGACTGGC           | Gene detection                        | <i>This study</i> |
| New IMI variant R | TTGGTACGCTAGCAGCAATA       | Gene detection                        | <i>This study</i> |
| VIM F             | GATGGTGTGGTCGCCATA         | Gene detection                        | 3                 |
| VIM R             | CGAATGCGCAGCACCAG          | Gene detection                        | 3                 |
| IMP F             | GGAAATAGATGGCTTAAATCT      | Gene detection                        | 3                 |
| IMP R             | CCAAACCACACTACGTTATCT      | Gene detection                        | 3                 |
| FRI-1 F           | TGAACCTATCGCCTCTCAG        | Gene detection                        | 11                |
| FRI-1 R           | CTGCTTCGTCATGTTGTCG        | Gene detection                        | 11                |
| TEM F             | CATTTTCGTGTCGCCCTTAT       | Gene detection                        | 4                 |
| TEM R             | TCCATAGTTGCCGACTCCC        | Gene detection                        | 4                 |
| CTX-M multiplex   |                            | Gene detection                        | 5                 |
| SHV F             | ATGCGTTATATCGCCTG          | Gene detection                        | 6                 |
| SHV R             | TTAGCGTTGCCAGTGCTC         | Gene detection                        | 6                 |
| GES F             | TTCCGATCAGCCACCTCTCA       | Gene detection                        | 7                 |
| GES R             | CTGGCAGGATCGCTCACTC        | Gene detection                        | 7                 |
| ampC multiplex    |                            | Gene detection                        | 8                 |
| ampC F            | GACATCCCCTGACTCGCTA        | Whole gene amplification & sequencing | <i>This study</i> |
| ampC R            | GTTTTACTGTAGCGCCTCGA       | Whole gene amplification & sequencing | <i>This study</i> |
| ampR F            | TTTCATCTTCTCCACCAGCC       | Whole gene amplification & sequencing | <i>This study</i> |
| ampR R            | ATAGCGAGTCAAGGGGATGT       | Whole gene amplification & sequencing | <i>This study</i> |
| ampD F            | ATGTTGTTAGAAAACGGATG       | Whole gene amplification & sequencing | 9                 |
| ampD R            | TCATGTTATCTCCTTATCTG       | Whole gene amplification & sequencing | 9                 |
| ompC F            | TGAGGAGAATGAAATTGCCGAC     | Whole gene amplification & sequencing | <i>This study</i> |
| ompC R            | GCGGCAAGAGTACACAAAA        | Whole gene amplification & sequencing | <i>This study</i> |
| ompF F            | AGACACCAAACTCTCATCAATAGTTC | Whole gene amplification & sequencing | 10                |
| ompF R            | CGCTATCAGGTTAACGGTA        | Whole gene amplification & sequencing | 10                |
| rspL F            | ACGTACAGCACACGACG          | Expression analysis                   | <i>This study</i> |
| rspL R            | AGCGTGTCTCCAGACTCAC        | Expression analysis                   | <i>This study</i> |
| ampC F            | GCATGGCGGTGGCCGTTAT        | Expression analysis                   | 10                |
| ampC R            | CTGCTTCCCGTCAGCTGT         | Expression analysis                   | 10                |
| ompF F            | TAATGACAGCAACGATGGCGAC     | Expression analysis                   | <i>This study</i> |
| ompF R            | AGCGCCTCAGAGTGTGTACC       | Expression analysis                   | <i>This study</i> |
| ompC F            | GCGCCAGTGGGAATACCAGA       | Expression analysis                   | <i>This study</i> |
| ompC R            | GAATGAACCCGCATCAGCGAA      | Expression analysis                   | <i>This study</i> |

**Figure S1: UPGMA tree of concatenated sequences of *ampC*, *ampR*, *ompF* and the corresponding amino acid changes of AmpC, AmpR, OmpF and OmpC and cephalosporin and carbapenem MIC**

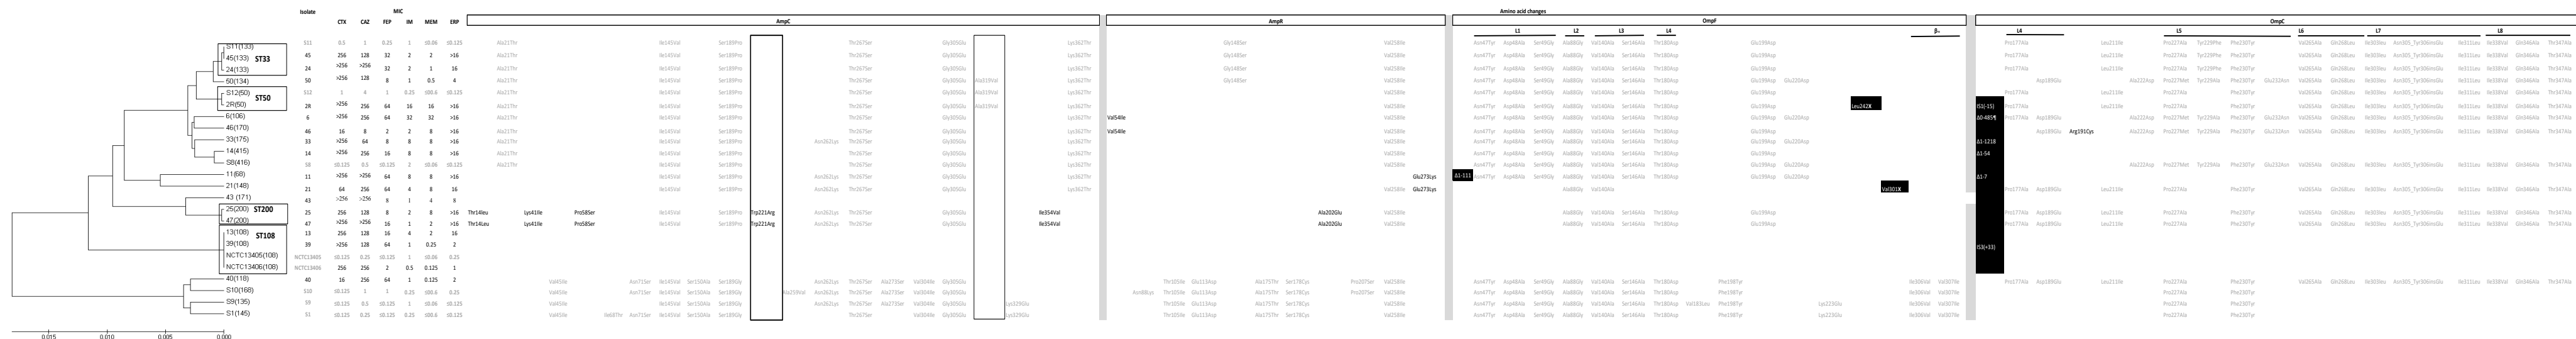

CTX: ceftazidime, CAZ: ceftazidime, FEP: ceftopime, IM: imipenem, MEM: meropenem, ERP: eropenem, MICs in mg/L, NCTC13405: reference wild type *E. coli*, NCTC13406: AmpC- $\beta$ -lactamase derepressed (constitutive hyper-producing) mutant of NCTC 13405. bold square:  $\Omega$ -loop, thin square:  $\Omega$ -loop of residues 289–3101, loops and transmembrane barrels of the outer membrane proteins are indicated as L and  $\beta$  respectively; + and – indicate the position of insertions upstream and downstream of the A of the start codon, OmpC: \* nucleotide 485 is fused to the adjacent two component system. Grey font: amino acid changes that are seen in carbapenem-resistant and -susceptible isolates, black font: amino acid changes that are only seen in carbapenem-resistant isolates, white font on black background: disruptions and indels of the gene

**Figure S2: UPGMA tree of concatenated sequences of the 7 DNA fragments of MLST. Isolate numbers (sequence types by MLST)**

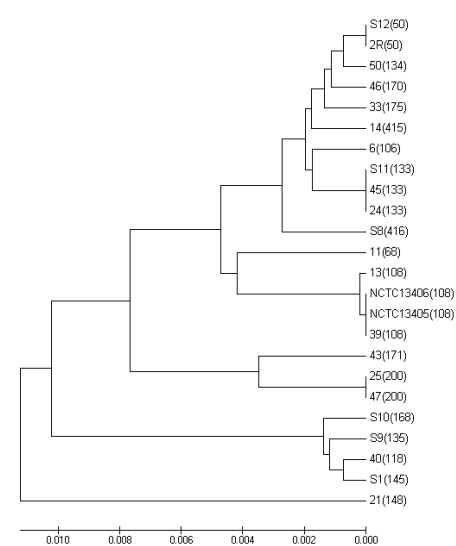

**Figure S 3. Outer membrane profiles of selected isolates on 12% SDS-polyacrylamide gel**

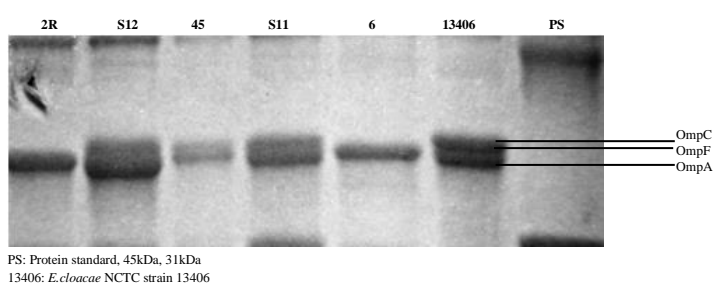

PS: Protein standard, 45kDa, 31kDa  
13406: *E. cloacae* NCTC strain 13406

**References**

1. Yigit H, Quesnel AM, Anderson GJ et al. Novel carbapenem-hydrolyzing beta-lactamase, KPC-1, from a carbapenem-resistant strain of *Klebsiella pneumoniae*. *Antimicrobial agents and chemotherapy* 2001; **45**: 1151-61.
2. Poirel L, Heritier C, Tolan V et al. Emergence of oxacillinase-mediated resistance to imipenem in *Klebsiella pneumoniae*. *Antimicrobial agents and chemotherapy* 2004; **48**: 15-22.
3. Ellington MJ, Kistler J, Livermore DM et al. Multiplex PCR for rapid detection of genes encoding acquired metallo-beta-lactamases. *The Journal of antimicrobial chemotherapy* 2007; **59**: 321-2.
4. Walker RA, Lindsay E, Woodward MJ et al. Variation in clonality and antibiotic-resistance genes among multiresistant *Salmonella enterica* serotype typhimurium phage-type U302 (MR U302) from humans, animals, and foods. *Microbial drug resistance* 2001; **7**: 13-21.
5. Woodford N, Fagan EJ, Ellington MJ. Multiplex PCR for rapid detection of genes encoding CTX-M extended-spectrum (beta)-lactamases. *The Journal of antimicrobial chemotherapy* 2006; **57**: 154-5.
6. Hopkins KL, Debeer-Graham A, Threlfall EJ et al. Novel plasmid-mediated CTX-M-8 subgroup extended-spectrum beta-lactamase (CTX-M-40) isolated in the UK. *International journal of antimicrobial agents* 2006; **27**: 572-5.
7. Bogueris P, Naas T, El Garch F et al. GES extended-spectrum beta-lactamases in *Acinetobacter baumannii* isolates in Belgium. *Antimicrobial agents and chemotherapy* 2010; **54**: 4872-8.
8. Perez-Perez FJ, Hanson ND. Detection of plasmid-mediated AmpC beta-lactamase genes in clinical isolates by using multiplex PCR. *Journal of clinical microbiology* 2002; **40**: 2153-62.
9. Naas T, Massard S, Garnier F et al. AmpD is required for regulation of expression of NmcA, a carbapenem-hydrolyzing beta-lactamase of *Enterobacter cloacae*. *Antimicrobial agents and chemotherapy* 2001; **45**: 2908-15.
10. Doumith M, Ellington MJ, Livermore DM et al. Molecular mechanisms disrupting porin expression in eropenem-resistant *Klebsiella* and *Enterobacter* spp. clinical isolates from the UK. *The Journal of antimicrobial chemotherapy* 2009; **63**: 659-67.
11. Dortet L, Poirel L, Abbas S, Queslati S, Nordmann P. Genetic and biochemical characterization of FRI-1, a carbapenem-hydrolyzing class A beta-lactamase from *Enterobacter cloacae*. *Antimicrobial agents and chemotherapy* 2015; Sep 21.
